# Supplementary material for: A facile approach to fabrication of well-dispersed NiO–ZnO composite hollow microspheres
Source: Royal Society of Chemistry journal article supplement (doi:10.1039/c3ra43678k), 2013-01-01
Supplement: c3ra43678k.pdf [file c3ra43678k.pdf]

## Electronic supplementary information

### A facile approach to fabrication of well-dispersed NiO-ZnO composite hollow microspheres

Qingshui Xie, Huizhang Guo, Xiangxin Zhang, Aolin Lu, Deqian Zeng, Yuanzhi Chen and Dong-Liang Peng\*

*Department of Materials Science and Engineering, College of Materials, Fujian Key Laboratory of Advanced Materials, Xiamen University, Xiamen 361005, China*

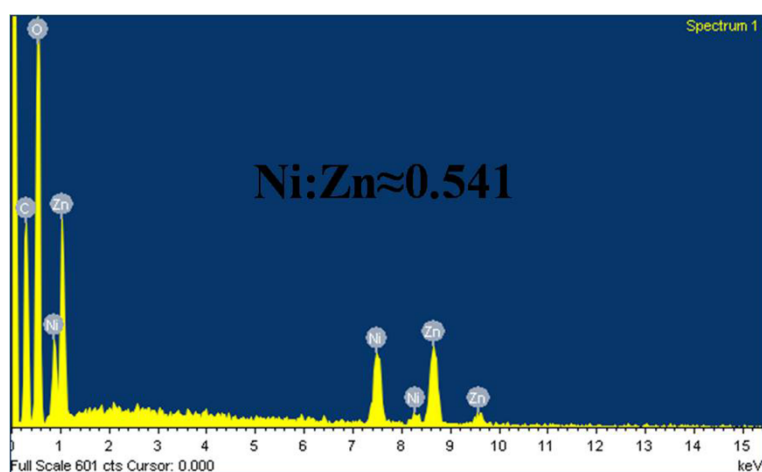

**Fig. S1.** EDS spectrum of the zinc-nickel citrate hollow microspheres obtained from the nickel nitrate solution aged at room temperature for 6 h.

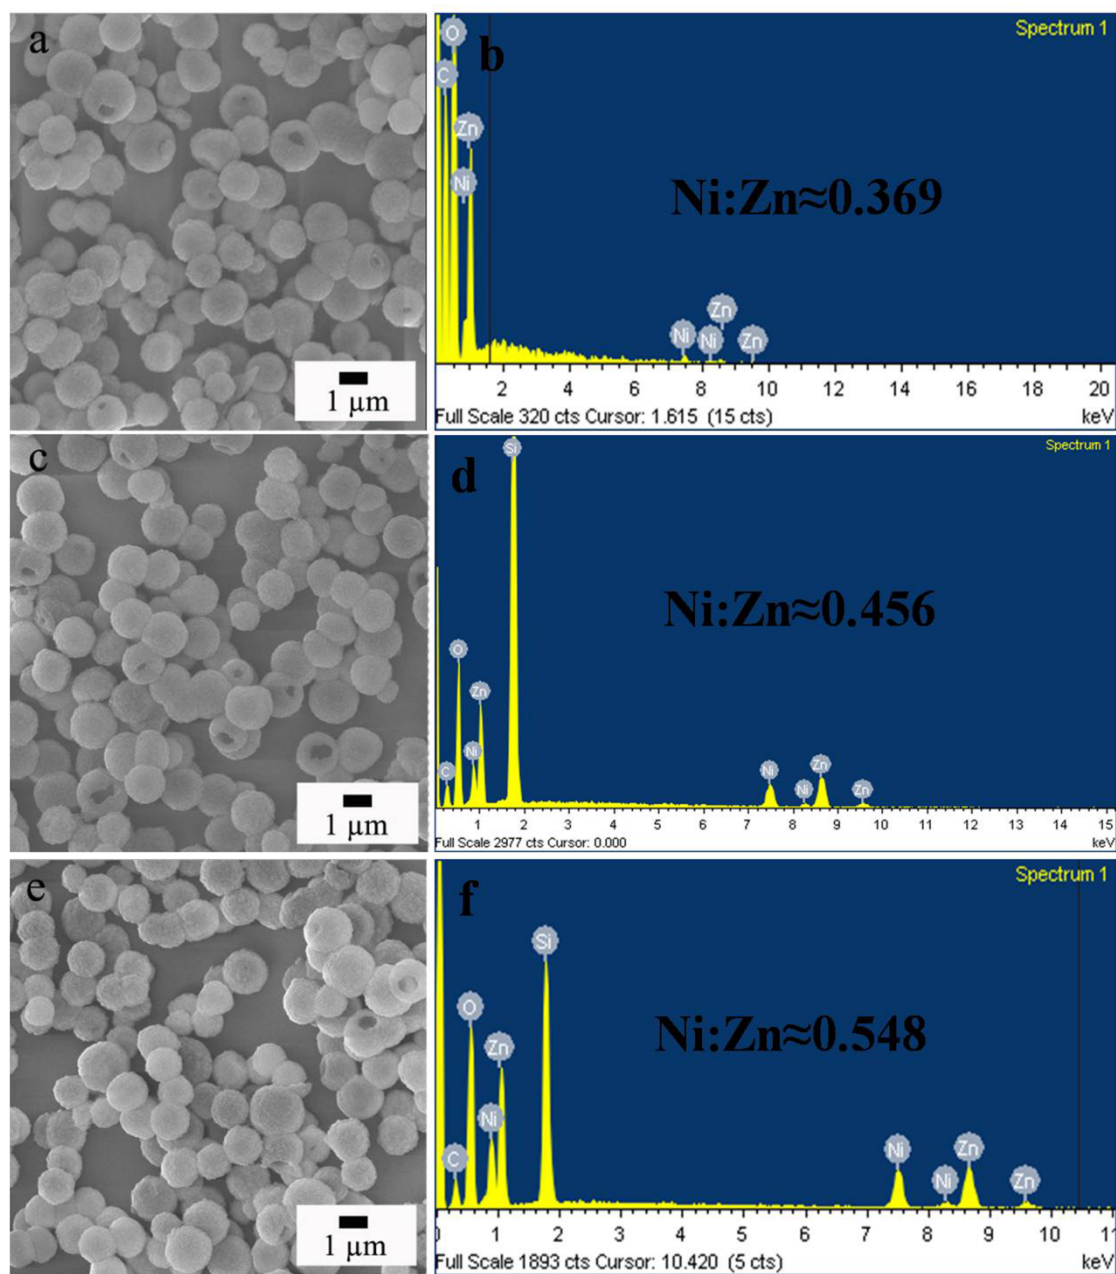

**Fig. S2.** The SEM images and EDS spectra of the zinc-nickel citrate hollow microspheres obtained with different ageing times: (a and b) 1 h, (c and d) 3 h, and (e and f) 8h. The Si signals are from substrates.

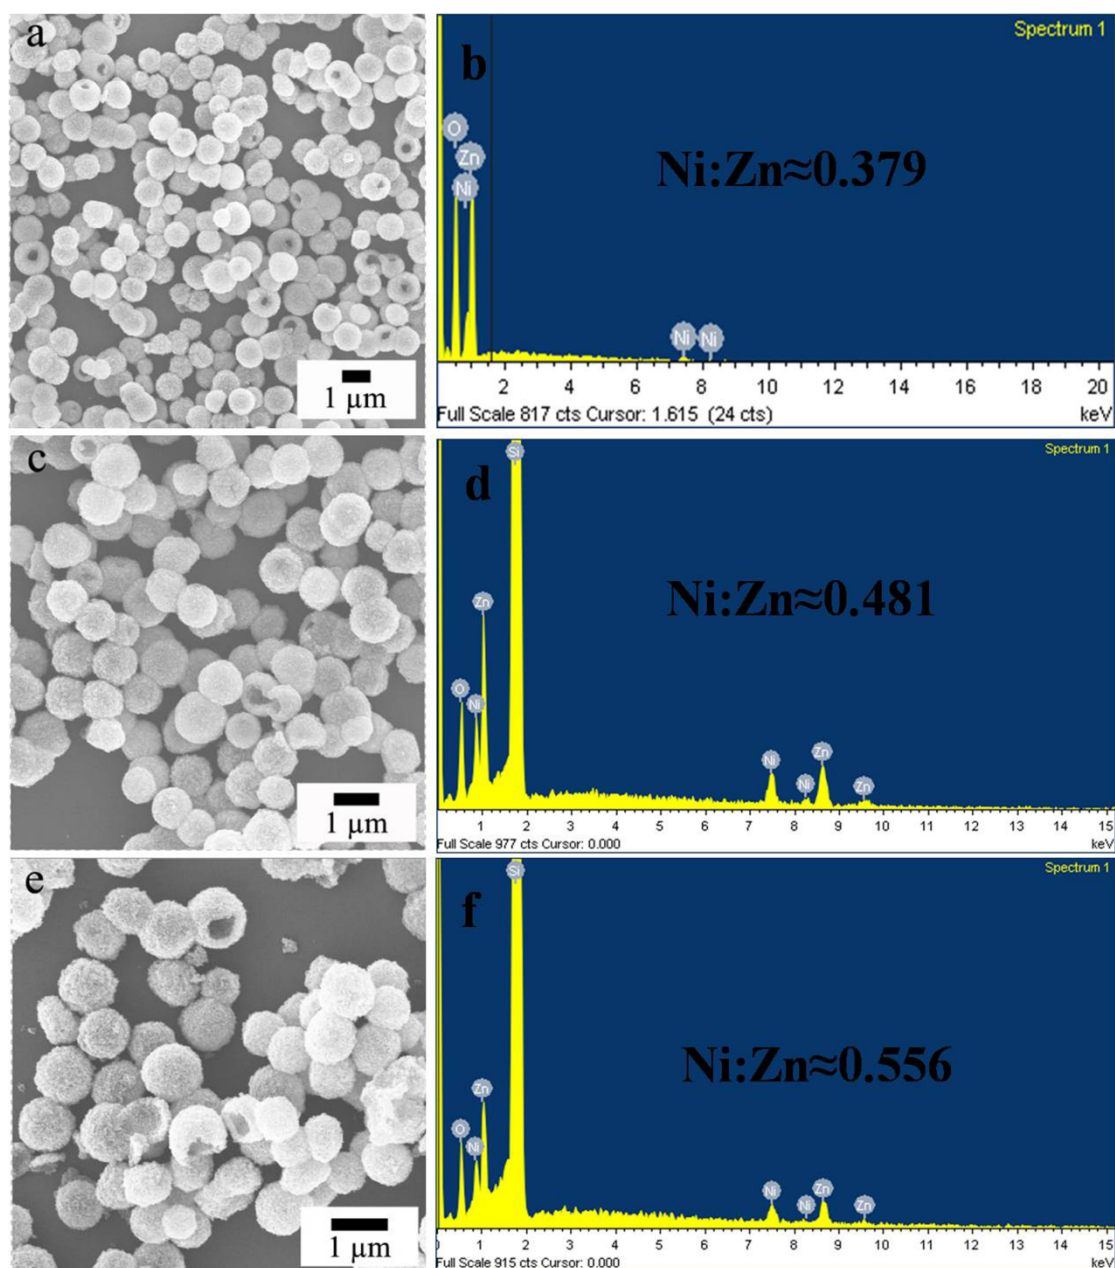

**Fig. S3.** The SEM images and EDS spectra of NZ1 (a and b), NZ3 (c and d) and NZ8 (e and f) hollow microspheres. The Si signals are from substrates.

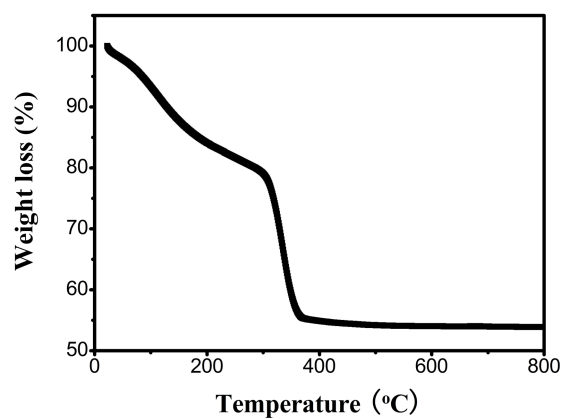

**Fig. S4.** TG curve for the zinc-nickel citrate hollow microspheres.

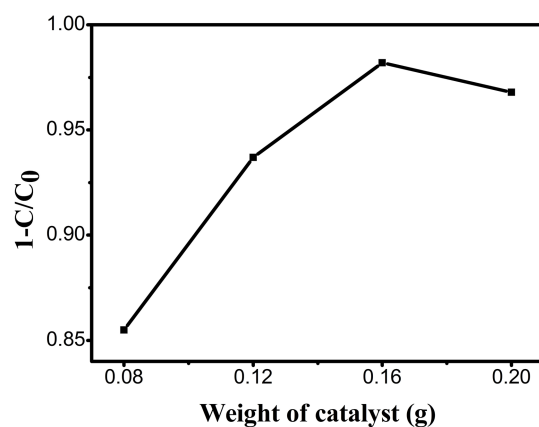

**Fig. S5.** Effect of photocatalyst dosage on the photocatalytic efficiency for the degradation of RhB under UV irradiation for 80 min.



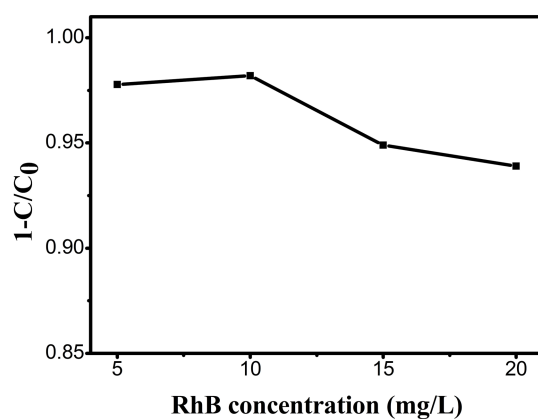

**Fig. S6.** Effect of initial dye concentration on the photocatalytic efficiency for the degradation of RhB under UV illumination for 80 min.

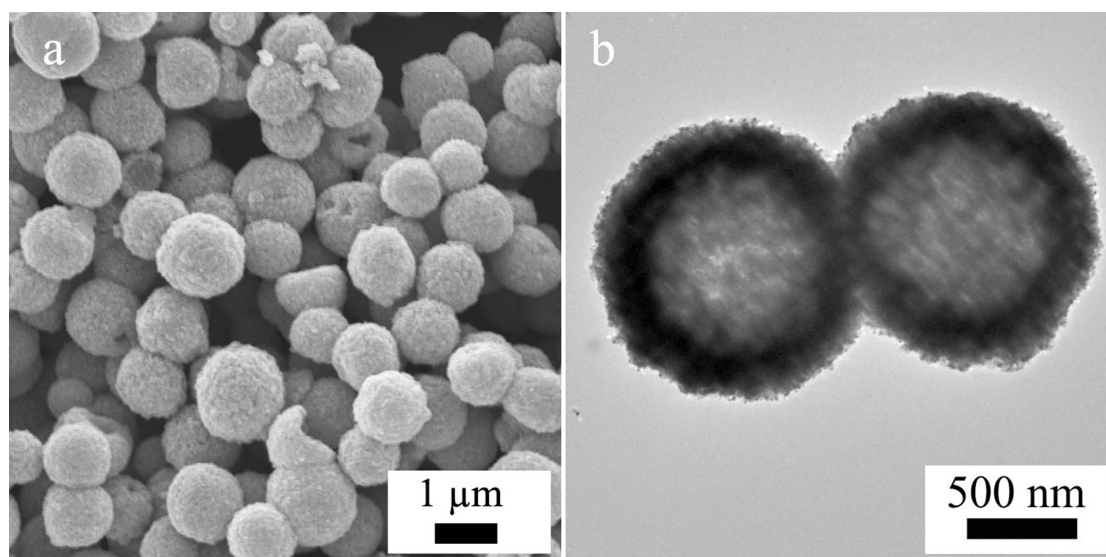

**Fig. S7.** The (a) SEM and (b) TEM images of NZ6 composite hollow microspheres after photocatalytic degradation of RhB for five cycles.

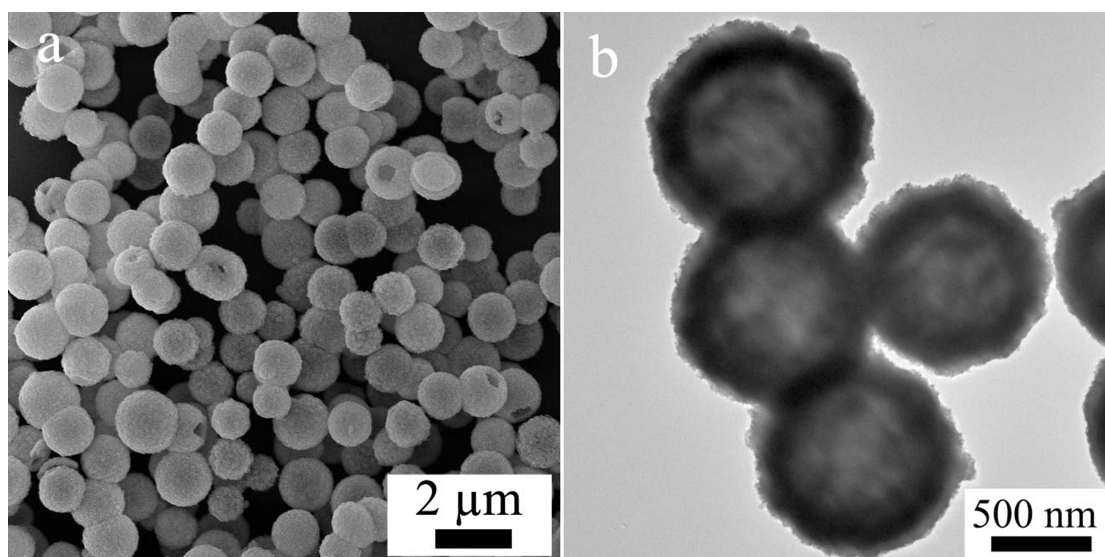

**Fig. S8.** The (a) SEM and (b) TEM images of CeO<sub>2</sub>-ZnO composite hollow microspheres with the ageing time of 60 min.

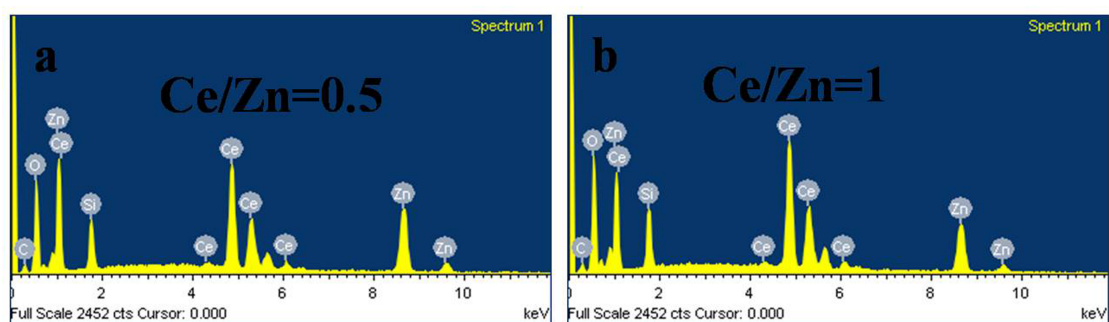

**Fig. S9.** EDS spectra of CeO<sub>2</sub>-ZnO composite hollow microspheres with the ageing time of (a) 30 min and (b) 60 min.

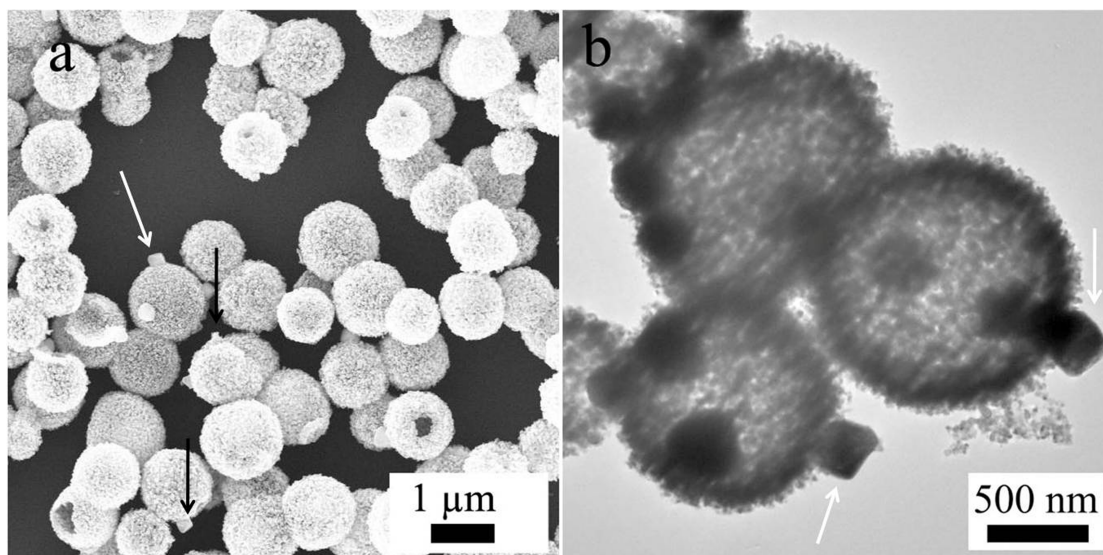

**Fig. S10.** The (a) SEM and (b) TEM images of CdO-ZnO composite hollow microspheres. Some CdO nanoparticles are indicated by arrows.
